# Supplementary material for: Unexpected Mechanism of Biodegradation and Defluorination of 2,2-Difluoro-1,3-Benzodioxole by Pseudomonas putida F1
Source: PubMed Central journal article supplement (PMC8593668; doi:10.1128/mbio.03001-21), 2021-11-16
Supplement: mbio.03001-21-sf001.pdf [file mbio.03001-21-sf001.pdf]

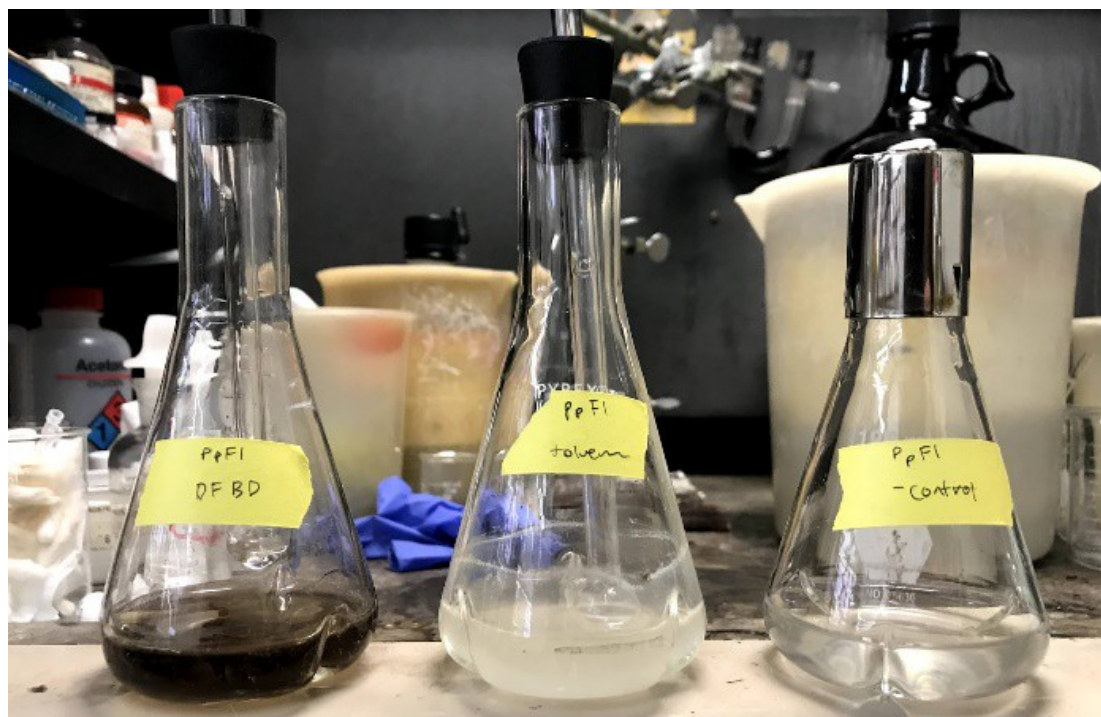

**Figure S1.** Cultures of *P. putida* F1 grown and induced with toluene, then moved to the respective carbon sources. From left to right: *P. putida* F1 with vapor bulb containing DFBD, *P. putida* F1 with vapor bulb containing toluene, *P. putida* F1 with no carbon source.
