# Supplementary material for: Unexpected Mechanism of Biodegradation and Defluorination of 2,2-Difluoro-1,3-Benzodioxole by Pseudomonas putida F1
Source: PubMed Central journal article supplement (PMC8593668; doi:10.1128/mbio.03001-21), 2021-11-16
Supplement: mbio.03001-21-sf002.pdf [file mbio.03001-21-sf002.pdf]

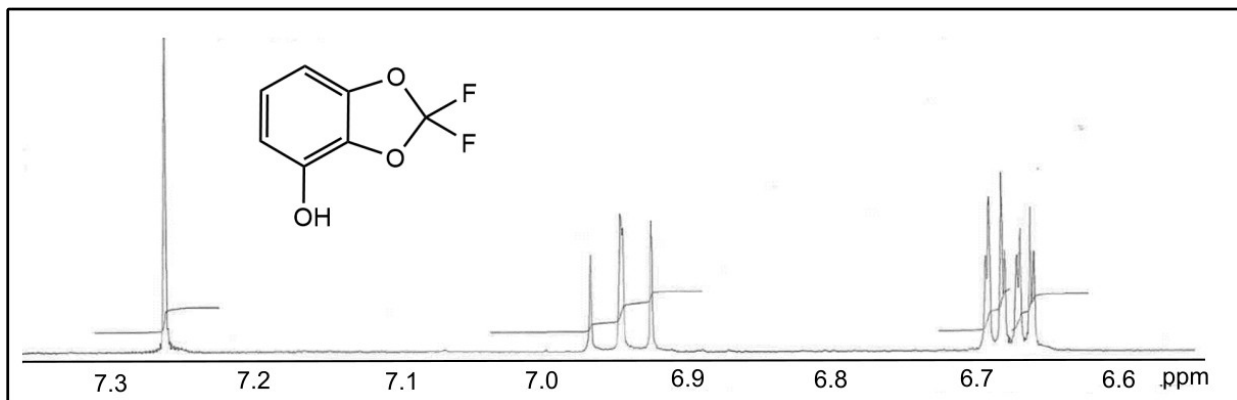

**Figure S2.** <sup>1</sup>H-NMR in CDCl<sub>3</sub> of the DFBD-4-ol standard
