# Supplementary material for: Unexpected Mechanism of Biodegradation and Defluorination of 2,2-Difluoro-1,3-Benzodioxole by Pseudomonas putida F1
Source: PubMed Central journal article supplement (PMC8593668; doi:10.1128/mbio.03001-21), 2021-11-16
Supplement: mbio.03001-21-sf005.pdf [file mbio.03001-21-sf005.pdf]

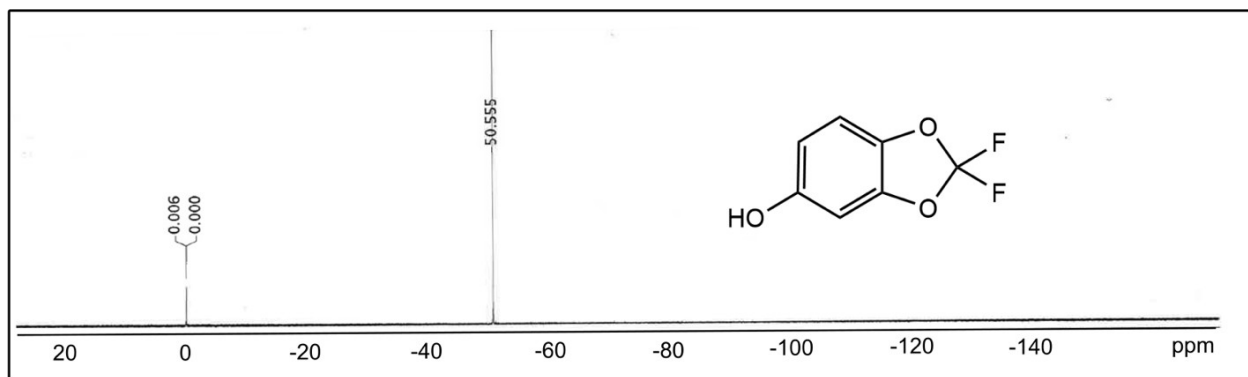

**Figure S5.**  $^{19}\text{F}$ -NMR of the DFBD-5-ol standard.
