# Supplementary material for: Unexpected Mechanism of Biodegradation and Defluorination of 2,2-Difluoro-1,3-Benzodioxole by Pseudomonas putida F1
Source: PubMed Central journal article supplement (PMC8593668; doi:10.1128/mbio.03001-21), 2021-11-16
Supplement: mbio.03001-21-sf006.pdf [file mbio.03001-21-sf006.pdf]

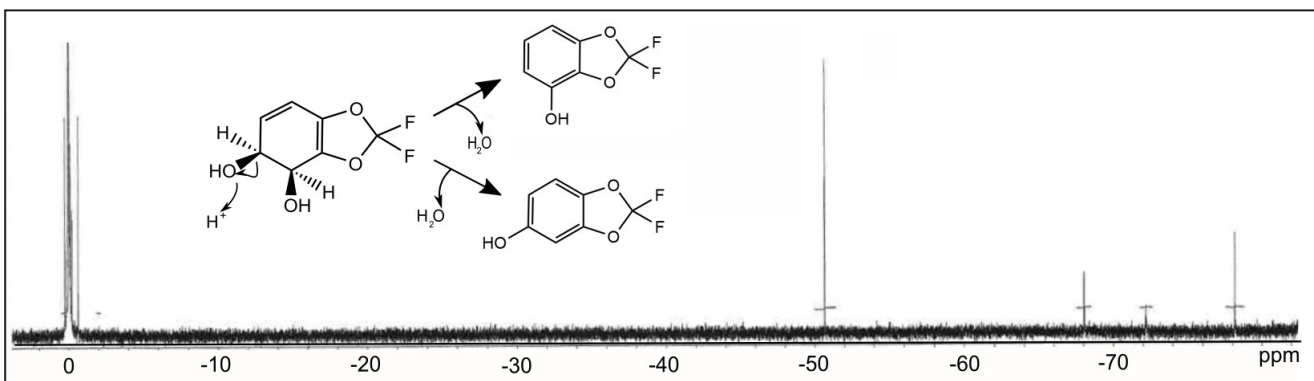

**Figure S6.**  $^{19}\text{F}$ -NMR in  $\text{CDCl}_3$  of the concentrated  $\text{CD}_3\text{CN}$  solution, previously containing the *cis*-dihydrodiol. Reactions show expected dehydration of the diol in the presence of acid
