# Supplementary material for: Unexpected Mechanism of Biodegradation and Defluorination of 2,2-Difluoro-1,3-Benzodioxole by Pseudomonas putida F1
Source: PubMed Central journal article supplement (PMC8593668; doi:10.1128/mbio.03001-21), 2021-11-16
Supplement: mbio.03001-21-sf008.pdf [file mbio.03001-21-sf008.pdf]

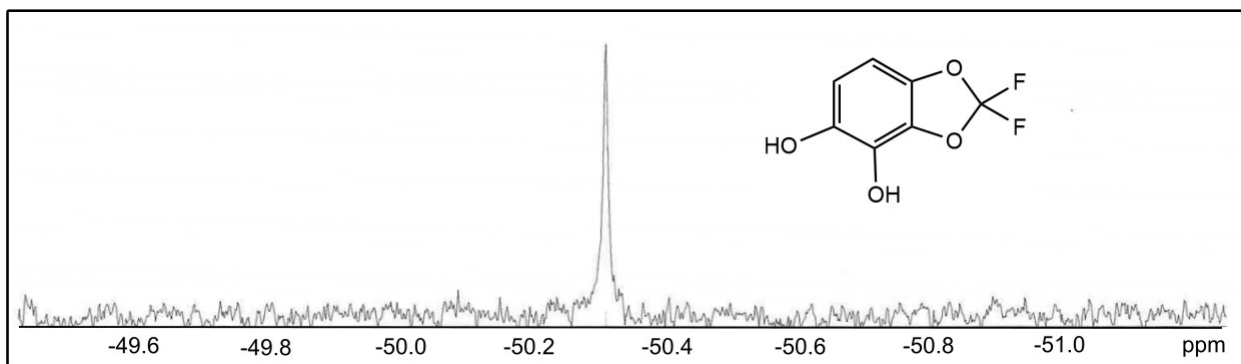

**Figure 8S.**  $^{19}\text{F}$ -NMR of the the *E. coli* pDTG602 supernatant extract containing DFBD-4,5-diol. Fluorine singlet illustrating rearomatized compound with magnetically identical fluoroineatoms.
