# Supplementary material for: Unexpected Mechanism of Biodegradation and Defluorination of 2,2-Difluoro-1,3-Benzodioxole by Pseudomonas putida F1
Source: PubMed Central journal article supplement (PMC8593668; doi:10.1128/mbio.03001-21), 2021-11-16
Supplement: mbio.03001-21-sf010.pdf [file mbio.03001-21-sf010.pdf]

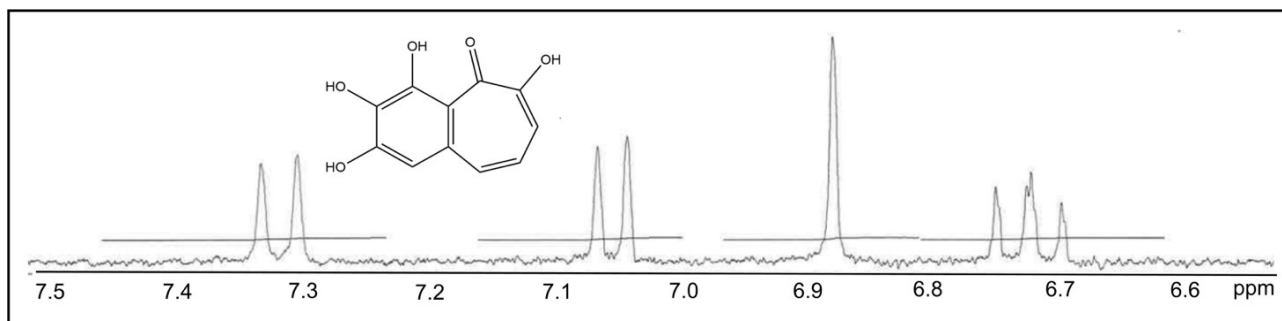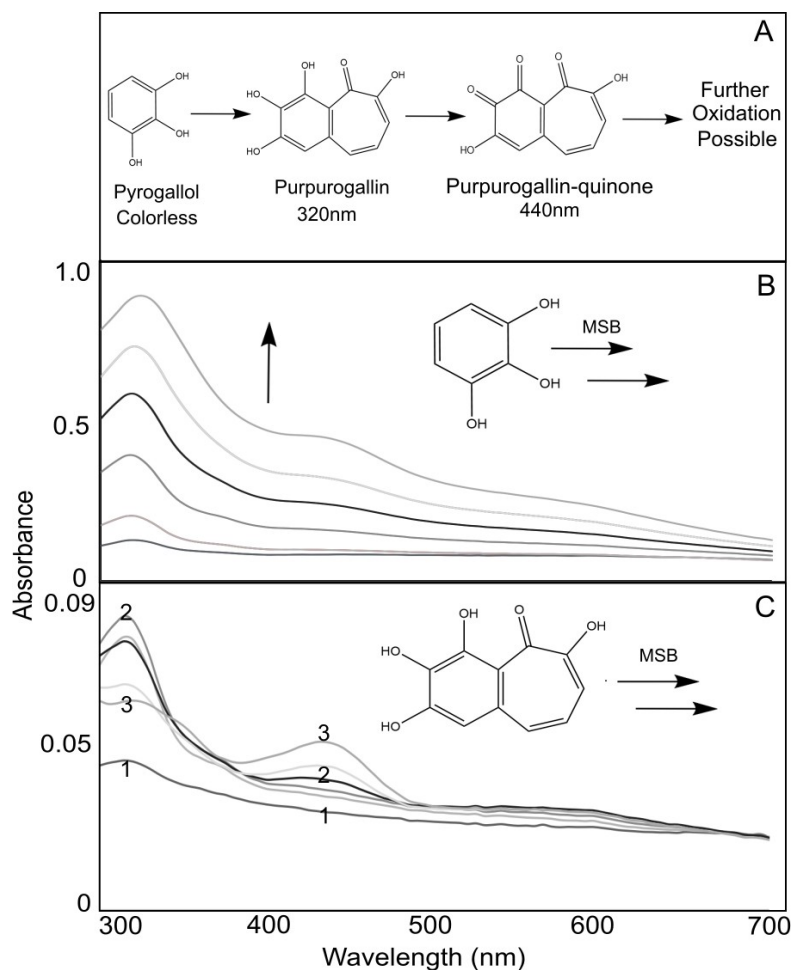

**Figure S10.** Oxidation products of pyrogallol. Top panel,  $^1\text{H-NMR}$  of standard purpurogallin. Bottom panel, UV-vis spectra of auto-oxidation of pyrogallol and pupruogallin in media. (A) Current knowledge of oxidized species. (B) Time course of pyrogallol (0.1 mM) oxidation in MSB media over 2.5 hours. Absorbance increases uniformly at 320 nm and 440 nm. (C) Time course of purpurogallin (0.02 mM) oxidation in MSB media over 1.2 hours. As the purpurogallin dissolved, an immediate increase was seen at 320 nm (2). Then, the 320 nm decreased and the absorbance at 440 nm increased (3).
